# Supplementary material
Source: PubMed Central journal article supplement (PMC7493142)
Supplement: 43058_2020_63_MOESM2_ESM.pdf [file 43058_2020_63_MOESM2_ESM.pdf]

**COMMITTEE ON RESEARCH ETHICS  
(1166- 2020)**

By means of this letter, the Committee on Research Ethics of the Universidad de los Andes certifies that the proposal **“Análisis de la coordinación de un cambio sistémico significativo en el sistema de salud colombiano como respuesta al COVID-19”** was reviewed and approved.

In accordance to the Colombian law, Resolución 8430 1993, this project classifies as “Riesgo Mínimo” or minimal risk. Professor Simon James William Tuner of the School of management at Universidad de los Andes presented the project to the Committee.

This certification is issued on this June 26<sup>th</sup> 2020

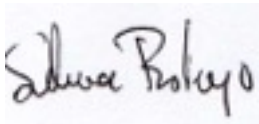

**SILVIA RESTREPO RESTREPO**  
Committee Chair
